## Correction

# Correction: LncRNA HOTAIR contributes Taxol-resistance of hepatocellular carcinoma cells via activating AKT phosphorylation by down-regulating miR-34a

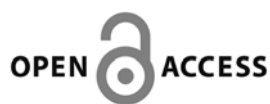

The authors of the original article “LncRNA HOTAIR contributes Taxol-resistance of hepatocellular carcinoma cells via activating AKT phosphorylation by down-regulating miR-34a” (*Biosci Rep* (2020) 40(7), <https://doi.org/10.1042/BSR20201627>) would like to correct Figure 4C, as the image used in the anti-NC group had been taken from the si-NC group of images in error during the figure preparation for their manuscript’s submission to the journal. The correct image from the anti-NC group has replaced this error in the updated Figure 4 present in this Correction.

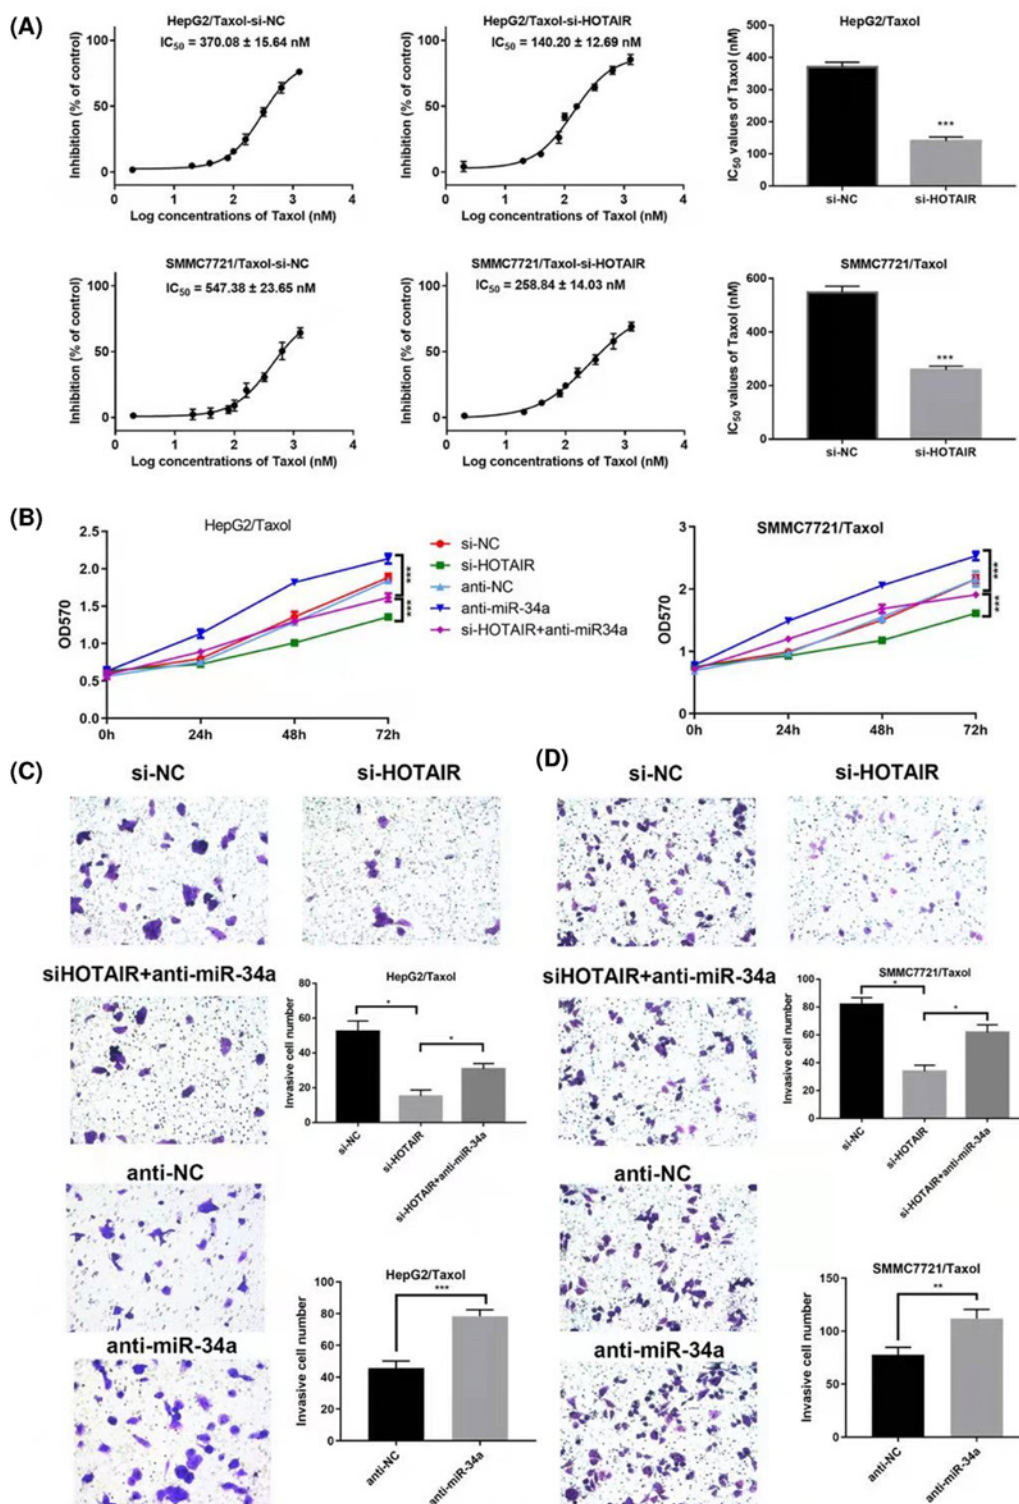

**Figure 4.** HOTAIR knockdown suppresses proliferation and invasion of HepG2/Taxol and SMMC7721/Taxol cells through up-regulating miR-34a

(A) Proliferation rates and  $IC_{50}$  values of HepG2/Taxol or SMMC7721/Taxol after transfections. (B) The proliferation curves after transfections in HepG2/Taxol or SMMC7721/Taxol cells. Typical images of the invasion assays: (C) HepG2/Taxol cells treated with si-NC; si-HOTAIR; si-HOTAIR+anti-miR-34a; anti-NC; anti-miR-34a; (D) SMMC7721/Taxol cells treated with si-NC; si-HOTAIR; si-HOTAIR+anti-miR-34a; anti-NC; anti-miR-34a. The means of three independent biological replicates are shown; error bars indicate the SD; \* $P < 0.05$ , \*\* $P < 0.01$ , \*\*\* $P < 0.001$ .
